# Supplementary material
Source: Frontiers journal article supplement (https://www.frontiersin.org/articles/255988)
Supplement: Table_6.XLS [file Table_6.XLS]

## Sheet: Sheet1
Supplemental Table S6. Salinity shock-responsive phosphoproteins quantified in D. salina upon palmella formation.
Gi Number(a)	Protein name(b)	Modificated Sequence(c)	Phosphopeptide.Ratio H/L Normalized. Average(d)	Change Trend		Phosphopeptide.Ratio H/L Normalized. Biol.1(g)	Phosphopeptide.Ratio H/L Normalized. Biol.2(h)	Phosphopeptide.Ratio H/L Normalized. Biol.3(i)	Phosphosite_1(j)	Location13_1#(k)	Motifs_1#(l)	Ratio H/L Normalized.Biol.1(m)	Ratio H/L Normalized.Biol.2(n)	Ratio H/L Normalized.Biol.3(o)	Phosphosite_2(j)	Location13_2#(k)	Motifs_2#(l)	Ratio H/L Normalized.Biol.1(m)	Ratio H/L Normalized.Biol.2(n)	Ratio H/L Normalized.Biol.3(o)	Phosphosite_3(j)	Location13_3#(k)	Motifs_3#(l)	Ratio H/L Normalized.Biol.1(m)	Ratio H/L Normalized.Biol.2(n)	Ratio H/L Normalized.Biol.3(o)	Phosphosite_4(j)	Location13 _4#(k)	Motifs_4#(l)	Ratio H/L Normalized.Biol.1(m)	Ratio H/L Normalized.Biol.2(n)	Ratio H/L Normalized.Biol.3(o)	Sublocation by software(p)										Protein Sequence(q)
				Peptide(e)	Site(f)																												Final Localization Results	1YLoc	Confidence Score	2LocTree3	Expected Accuracy	3Plant-mPLoc	4ngLOC	Probabilities	5TagetP	Reliability Class
	Cell structure (4)
1279362	Striated fiber-assemblin (SFA)	SSVLpTTTGSAIK	5.48665	Increased(2)	Increased(1)	6.0975	4.8758		T24	MRSSVLTTTGSAI	CK1	6.7321																					Cyt	Cytoplasm	Normal (0.58)	Cytoplasm	0.93	Golgi apparatus	Mitochondrion	11.85	Chloroplast	4	MATSGMVSPTSGRPFSPMRSSVLTTTGSAIKLEHVSEKFAGLWTDLEQEKQARRIAEATRMQLFQESVLRLEKSMEAEVKRRAESDKQLQAHFEGELRVLHERSACQVAEMHNSLKSAIDSFSSRVQDLHAVIREERDQRRNDIEHLATSLVGKVNECVAALDEERTIRMQEQAMALKRFGEDISGVNHRVDTEKAQREADLSGLRVEIHDVLANRNIQDEQFKTVTLDELNAFKAALALEREERVAEDDEIVQAINDYTRALQEGLKMVNMQHNSA
		SpSVLTTTGpSAIK	3.66		Increased(1)				S21	FSPMRSSVLTTTG	AURORA;AURORA-1;PKA		3.6585		S28	VLTTTGSAIKLEH	CK1
226524137	Flagellar associated protein (FAP)	SLpSVEEK	0.65181	Decreased(1)	Decreased(1)	0.65181			S341	TLERSLSVEEKRE	CAMK2;CHK1;CHK1/2;CK2;PKD	0.65181																					#Cyt[1]	Nucleus	Normal (0.61)	Nucleus	0.84	Nucleus	Nucleus	18.04	_	5	MTSPGRLGSPTSPGRLGSPTSPVGKTLGGSFVSEDGEPVMYSPGPGASGGVLKSTAFEEEQNRMLAARRKAQKQVEVMEQNALKKLERQAAAEEKVRRAKELERQRAHEKALEDQKKANETFIKLQQLKLNQEKLEKEKQRRAAEKHERELELKRLREAEERRARQEKKEKEELRRQRNAEFQARVDAMRAEKNRKIAHKARLMEEKEAARLAARRKEEQEIAAKNQAIHLFQAQKREQAIVRSEQTTEQFRTKTMKKTTAADMRWKDLTSKKAAKIQDMRSKLSERSQYVLSRNQAAKDIEQKRINALIERAEKEEERIKLIADRRKREAAMETLERSLSVEEKREKVECMKRYKEYQQAQLLEKIERDTARTVALQSAKEELRRQRREENMRVSLEI…
2625154	Tubulin alpha chain (TUA)	TIQFVDWCPpTGFK	0.21105	Decreased(1)	Decreased(1)	0.21105			T349	FVDWCPTGFKCGI		0.21105																					Cyt	Cytoplasm	Strong (0.84)	Cytoplasm	0.97	Mitochondrion/Nucleus	Cytoskeleton	91.53	_	3	MREAISIHIGQAGCQIGNTCWELYCLEHGIQPDGQMPSDKTIGGGDAFNTFFSETGAGKHVPRAIFLDLEPTVIDEVRTGTYRQLFHPEQLISGKEDAANNFARGHYTIGKEIVDLALDRIRKLADNCTGLQGFLVFNAVGGGTGSGLGSLLLERLSVDYGKKSKLAFTVYPSPQVSTAVVEPYNSVLSTHSLLEHTDVAIMLDNEAIYDICRRSLDIERPTYTNLNRLIAQVISSLTASLRFDGALNVDITEFQTNLVPYPRIHFVLSSYAPIISAEKAYHEQLSVAEITNAVFEPASMMVKCDPRHGKYMACCLMYRGDVVPKDVNAAVATIKTKRTIQFVDWCPTGFKCGINYQPPTVVPGGDLAKVQRAVCMISNSTAIGEIFSRLDHKFDLMYA…
284518784	Kinesin-like calmodulin binding protein (KCBP)	AGGpSALGLAQANFGPK	0.49793	Decreased(1)	Decreased(1)			0.49793	S581	DGKAGGSALGLAQ				0.49793																			Cyt	Cytoplasm	Strong (0.89)	Cytoplasm	0.84	Nucleus	Chloroplast	12.46	_	1	MSTQEDPYDQEGHGGQGSDDDTAPTARLDGLQGLQDQFQVEAFAKAAKSGKFASGASNLLAKIPSLRRTPGKSKPGEGAGGGLEDLLVFSNEPIPTSLLKMNSDHMGRATKMFAGMLKYMGEQGDPAEPAVGIEIAQKLHQGLKRPELKDELYMQLLKQTRGNPNVNSRTKAWELFQLTAATMPPSKDFVGLVSEYIHGVAHDDNEVPAVRNLASKTWSGLKRSAKAGPRRTLPSTEEIEAMFMGRRLNTIVFFLDETFEELSYDVTATVLEAVGQLAGMIKLQNYSTFTLFECRRPLSKAAQNSSSITNEPVTDEHLLLDDNKYIADVLCEFHNSKMAKEGWQSRLLFKKRMFRETDESITEPQFVNLSYVQAQHDYLMGNYPVVREDATQMCALQMQ…
	Carbohydrate and energy metabolism (3)
290465235	Phosphoglucomutase 1 (PGM)	HYGGIIMSASHNPGGPEGDFGIK	0.279175	Decreased(2)		0.28143	0.27692																										Chl	Chloroplast	Small (0.21)	Chloroplast	0.92	Chloroplast	Chloroplast	47.37	Mitochondrion	5	MLHSGSRLTGASNRSANRSCIPSNAQHLRPVRGAQQQQQARQAPLVAMATAVKELPTQPIEGQKTGTSGLRKKTNVFMGPNYLANWVQSLFNALGAEIKGKTLCLGGDGRYFGKEASQIIIKLAAGNGFSKVVVGQNAIMATPAMSALIRRKKHYGGIIMSASHNPGGPEGDFGIKFNYTSGEPAPESITDKIYGETQKVSTLKMADMPDVDLNKIGSSKFGDFELEVIDPVEDYMAQLKEVFDFEALKKFVARKDFKMIFDAMHAVTGPYATRILVQELGAPASTVKDGVSSPDFNGGHPDPNLTYAKELVDIMWGANAPTFGAASDGDGDRNMILGNGFFVTPSDSVAMIAANASCIPYFKGGLKGVARSMPTSAALDRVAKGLNLPYFETPTGWKF…
		HYGGIIoMSASHNPGGPEGDFGIK	0.420005	Decreased(2)		0.43896	0.40105
		KHYGGIIMSApSHNPGGPEGDFGIK	0.55994	Decreased(1)	Decreased(1)	0.55994			S163	GIIMSASHNPGGP		0.35601
208463466	Glucose-6-phosphate isomerase (GPI)	DLTSPLHTFEASTLDoMPTGR	0.33715	Decreased(2)		0.50445	0.16985																										Cyt	Cytoplasm	Normal (0.46)	Cytoplasm	0.94	Cytoplasm	Cytoplasm	72.5	Mitochondrion	4	MLSNFKQGLRGTERLNQQGAFQGVPSAPAVPRGAQQPRTTQPSPRTTRVATRVARVPTEPRVDAEKDLTSPLHTFEASTLDMPTGRDVESISDTEEWKALQEHVKEINTTHLRDLLRDEGRCMNLIKESEGIYCDLSRQRITNKTSELLMKLANKANLKDKIEAMFSGEHINSTEDRAALHVATRARRDQSIVVDGRDVVPDVWEVLDKIKDFSNKVRSGEWKGVTGKPLKNVVAIGIGGSFLGPLFVHTALRTEPIAAMESEGRTLRFLANVDPIDVARALKDMNPEETLVVVVSKTFTTAETMLNARTVRKWLIAQLGPDAVAKHMVAVSTNLKLVKEFGIDPENAFGFWDWVGGRYSVCSAVGMLPLALEYGFDLMEEFLLGANSIDDHFRLMPLE…
300259927	Hypothetical protein VOLCADRAFT_65163, containing pfam01238 phosphomannose isomerase type I domain (PMI)*	ALpSIQSHPDK	0.44476	Decreased(1)	Decreased(1)		0.44476		S98	SVAKALSIQSHPD	CHK1;PKD		0.44476																				Cyt	Cytoplasm	Strong (0.81)	Cytoplasm	0.85	Chloroplast	Nucleus	14.04	Mitochondrion	5	MLQLRCAAQNYDWGRKASESEVAKLAQANGSAIDESKPFAELWMGAHPNCPSKLQSTGESLQACLDKYPQLLGDKVVQNFGNQLPYLFKVLSVAKALSIQSHPDKALAERLHKEHPKAGLYADPNHKPEMALALSDFEALCGFASIAELQERLRRVPELALLVGQQHVDALLALPTTIAEEDDETASKAAKQTAFTALMTAPQEAVTAAVRGLVERLKAIAPGEELTPHEALALRLNEQFPDDVGLMSAFFLNLVRLPDGHAIYLPANEPHAYLAGELVECMAASDNVIRAGLTPKFKHADVLCESLTYRQGLPDVLTGSPAGTGITVYQPPFEEFEIHRIDCGSESAPGCKAMTLPASEGPRILLVQHGEAEATVSGQLPDALQAVSELESALALARG…
	Photosynthesis (5)
333691283	Light-harvesting chlorophyll a-b binding protein, photosystem II (LHCb)	VDGpTGPAGFSPGVGK	2.18205	Increased(2)	Increased(2)	2.3545	2.0096		T181	KFRVDGTGPAGFS		2.2785	2.1167																				Chl	Chloroplast	Small (0.07)	Chloroplast membrane	0.89	Cell membrane/Cell wall/Chloroplast/Cytoplasm/Mitochondrion	Chloroplast/Cytoplasm	46.72	Chloroplast	3	FLFEKLKSATASKAAAPAKAAPSKKAAAPKRAASRKVSNPPDLEKWYGPERKLFLPGGLLDRDDVPEYLNGELAGDYGYDPLGLGKDEEQVEKYRANELLHARWAMLAAAGILIPEGLQANGADIKGGTWFETGAEMLNGGTLNYFAVPFGVVQNPLPLAAVTLIEIVLLGAVEKFRVDGTGPAGFSPGVGKFDSDIFDGLDQLYPGGPFDPLNLADDPEVFAELQVKETKNGRLAMVGVLAFAIQSYVTGEGPYANFTKHISDPFGYNLLTVLQGDDRVPTL
		FRVDGTGPAGFSPGVGK	2.0738	Increased(2)		2.0309	2.1167
246880776	Photosystem II protein H (PsbH)	NSpTQTSTSQEPGIVTPLGTLLRPLNSEAGK	0.341875	Decreased(2)	Decreased(1)	0.28716		0.39659	T8	ATGKNSTQTSTSQ	FHA KAPP	0.28716																					Chl	Chloroplast	Small (0.04)	Chloroplast membrane	0.92	Chloroplast	Chloroplast	42.62	_	3	MATGKNSTQTSTSQEPGIVTPLGTLLRPLNSEAGKVLPGWGTTVLMAVAILLFAVFLLIILEIYNSSLILDGVTNSWESLSAK
158277740	Pyruvate phosphate dikinase (PPDK)	GoMYSAEGVLCQLGGoMpTSHAAVVAR	0.759915	Decreased(2)	Decreased(1)		0.49803	1.0218	T506	CQLGGMTSHAAVV	FHA KAPP		0.49803																				Chl	Chloroplast	Normal (0.48)	Chloroplast	0.92	Chloroplast	Chloroplast/Cytoplasm	42.42/35.06	Chloroplast	3	MRGGSPASGEKGHRRRKPVGRLLRRRRPRQGRRQARPRTPVQHPPPHSSHIHQRVFIFGKNKSQGDATMK NLLGGKGANLAEMSRIGLSVPPGLTITTDTCAEFHTNGRQLPAGCWEEILAGLRSVEEEMGCRLGDAAAP LLLSVRSGAAVSMPGMMDTVLNLGLNDACAAGLAARSGDERFAYDAYRWRFLDMYGDVVMGIPHHLFEEQ LERLKAEQRVSEDTALTAADLRTLVARYKEVYKQLGQVFPEDPYEQLRLAIYAVFDSWRSERADVYRAVN GITGLTGTAVNVQAMAFGNMGPTSGTGVCFTRNPSTGERKLYGEYLINAQGEDVVAGIRTPEPIETLERS LPGAFKELLDNCALLEKHYKDMQDIEFTVQEGKLYMLQCRGGKR…
		GoMYSAEGVLCQLGGoMTSHAAVVAR	0.37768	Decreased(1)		identified	identified	0.37768
1173346	Sedoheptulose-1,7-bisphosphatase, chloroplastic (SBPase)	TASCAGTACVNpSFGDEQLAVDMVADK	0.14579	Decreased(3)	Decreased(2)	0.3532	0.020574	0.063597	S123	GTACVNSFGDEQL	CK2	0.39794	0.022992																				Chl	Chloroplast	Normal (0.68)	Chloroplast	0.99	Chloroplast	Chloroplast	56.04	Chloroplast	5	MAAMMMRQKVAGAIAGERRSAVAPKMGRAATAPVVVASANASAFKGAAVTARVKASTRAARVQSRRTAVLTQAKIGDSLAEFLVEATPDPKLRHVMMSMAEATRTIAHKVRTASCAGTACVNSFGDEQLAVDMVADKLLFEALKYSHVCKLACSEEVPEPVDMGGEGFCVAFDPLDGSSSSDTNFAVGTIFGVWPGDKLTNITGREQVAAGMGIYGPRTVFCIALKDAPGCHEFLLMDDGKWMHVKETTHIGEGKMFAPGNLRATFDNPAYERLINFYLGEKYTLRYTGGIVPDLFQIIVKEKGVFTNLTSPTTKAKLRILFEVAPLALLIEKAGGASSCDGKAVSALDIPILVCDQRTQICYGSIGEVRRFEEYMYGTSPRFSEKVVA
		TASCAGTACVNpSFGDEQLAVDoMVADK	0.17144	Decreased(3)		0.43659	0.024245	0.053485
246880744	ATP synthase CF1 alpha subunit (CF1-ATPA)	AIEAAAPGIVpSR	2.0404	Increased(1)	Increased(1)		2.0404		S139	AAPGIVSRRSVYE			2.0404																				#Chl[2]	Cytoplasm	Normal (0.54)	Cytoplasm	0.87	Chloroplast	Mitochondrion	62.68	_	2	MAMRTPEELSNLIKDLIEEYTPEVKMVDFGIVFQVGDGIARIYGLERVMSGELLEFEDGTLGIALNLEANNVGGVLLGDGLKITEGSRVRCTGRIAEIPVGEAYLGRVVNSLAQPVDGKGPINTTDSRAIEAAAPGIVSRRSVYEPLQTGLVSVDSMIPVGRGQRELIIGDRQTGKTAIGVDTILNQKGKGVICVYVAIGQKASSVAQVLTTLKERGALDYTIIVMSTANEPATLQYLAPYTGATLAEYFMYTGRPTLCVYDDLSKQAAAYREMSLLLRRPPGREAYPGDVFYLHSRLLERAAKLNTALGEGSMTALPIVETQEGDVSAYIPTNVISITDGQIFLSSGLFNSGLRPAINVGISVSRVGSSAQFKAMKQVAGSLKLALAQFGELEAFSQF…
	Other metabolisms (4)
307106155	Hypothetical protein CHLNCDRAFT_48950, containing cd00831 chalcone and stilbene synthases domain (CHS/SS)*	CFpSTIR	1.7535	Increased(1)	Increased(1)	1.7535			S6	_MVRCFSTIRFVV	CAMK2;CHK1	1.7535																					#Chl[3]	Chloroplast	Normal (0.50)	Cytoplasm	0.83	Cytoplasm	Plasma Membrane	48.62	Mitochondrion	5	MVRCFSTIRFVVACLADYRHGAPVALKYVKRGYHVLCSHGLTLALMPLAATGVVTFVLSCLLLVFVAATY VFTRSRPVYLLNFYCLKPPANLKINNEFFMQHSRNSKAFTQDSLDFQEKVLSRSGLGEETYLPGGIMSQP PRINMQAAREEAQLVLFNTVAEVLKATGTKPQAVDILVVNCSLFNPTPSLSAMIVNHFKMRSNVMTYNLS GMGCSAGVISIGLAQQLLQVFPNSTALVVSTENLTKNWYFGNDKSMLVPNCLFRLGGAAMVLSNKRTDRW RAKYELLHVVRTHMGQDDAHYGCVYQKEDSDGKEGVFLSKELMRIAGHALKANITTLGPLVLPISEQLLFFGNLVARKMLRLKVRSYIPDFKLAFEHFCIHTGGRGVIDAIEKQL…
227477517	Unnamed protein product, containing pfam00120 glutamine synthetase domain (GS)*	HETpSSMNDFSWGVANR	1.6869	Increased(1)	Increased(1)	1.6869			S331	TGKHETSSMNDFS		1.6869																					Cyt	Cytoplasm	Normal (0.32)	Cytoplasm	0.94	Cytoplasm	Cytoplasm	51.79	_	2	MSPPTGEKYSLPPVFGTQGQITQLLDPIMAERFKDLSQHGKVMAEYVWIGGTGSDLRCKTRVLDSVPNSVEDLPVWNYDGSSTGQAPGDDSEVFLIPRAIYRDPFRGGDNILVLADTYEPPRVLPNGKVSPPVPLPTNSRHACAEAMDKAAAHEPWFGIEQEYTVLDARTKWPLGWPSNGFPGPQGPYYCAAGAGCAIGRDLIEAHLKACLFAGINVSGVNAEVMPSQWEYQVGPCTGIESGDQMWMSRYILIRCAELYNVEVSFDPKPVPGDWNGAGGHVNYSNKATRTAETGWAAIQQQVEKLGKRHAVHIAAYGEGNERRLTGKHETSSMNDFSWGVANRGASVRVGRLVPVEKCGYYEDRRPASNLDPYVVTRLLVETTLLM
		HETSSoMNDFSWGVANR	0.37345	Decreased(1)		0.37345	identified
		HETSSMNDFSWGVANR	0.108789	Decreased(2)		0.17193	0.045649
283139174	Glutamine synthetase II (GSII)	HEpTSSOMDDFSWGVANR	0.21415	Decreased(1)		0.21415																											Cyt	Cytoplasm	Normal (0.68)	Cytoplasm	0.94	Cytoplasm	Cytoplasm/Chloroplast	45.32	_	2	MSPSGEKYTLAPVFGTDGQITQLLDPQIWSRFEDLDQSGKVCAEYVWIGGTGADLRSKTKVVPKVPSSADELPHWNYDGSSTGQAPGEDSEVYLIPRAIYRDPFRGGDNILVMADAYEPPRVNADGTVSDPVPLPTNTRYAAAEAMTKAAAQEPWFGIEQEYTVLDARTKWPLGWPSNGYPGPQGPYYCSAGAGNAIGRDLIEAHLRACLYAGINVSGVNSEVMPSQWEYQVGPCTGIDSGDQLWMSRYILVRLAELYNVTVTLDPKPIPGDWNGAGGHVNYSNNDTRAEGTGWAAIQKQVEKLGRRHAVHIAAYGEGNERRLTGKHETSSMDDFSWGVANRGCSIRVGRMVPVEKSGYYEDRRPASNLDPYVVTRLLVESTLLQ
307109275	Hypothetical protein CHLNCDRAFT_57286, containing cd04301 N-Acyltransferase superfamily (NAT)*	GARpSPPR	0.22058	Decreased(1)	Decreased(1)		0.22058		S32	ASRGARSPPRPAS	CDK1;CDK2;Proline-directed		0.22058																				Chl	Chloroplast	Very strong (0.98)	Nucleus	0.89	Chloroplast	Nucleus	28.92	Chloroplast	1	MTVSACLTTSSATHCCQPCAIRRGSASRGARSPPRPASQRARRGLACRGFLSGLFGSGGGSGGATVAEPGVAEDYSLENLDEVLLTELQAEDGSQRYIVYRNGGLVDAAELEALCDKVGWPRRPQNKVQAALANSFLVATLTLEDAPPRSSSSDCSDGSSSGSGSGSPPTSSRPASSSSGTPGRLIGLARCTSDGAFNATLWDVLVDPEFQGQGLGKALVEGVTRTLLKRDITNITLFADSAGKP
	Transcription (4)
300261198	Hypothetical protein VOLCADRAFT_82285, containing smart00658 RNA polymerase subunit 8 domain (RPB8)*	FSLVLAWTLNLDApTPGpSEK	2.0722	Increased(2)	Increased(2)	1.8537	2.2907		T72	TLNLDATPGSEKY	FHA KAPP;NEK6;Proline-directed	1.8537	2.2907		S75	LDATPGSEKYDAF		1.8537	2.2907														Nuc	Cytoplasm	Normal (0.73)	Nucleus	0.88	Nucleus	Chloroplast	34.3	_	2	MARSQPILFEDVFDVVDKDPDGKKFDSVSRFICHSDLYEMDLHIDLNVELFPLQRNDKFSLVLAWTLNLDATPGSEKYDAFPAISGRRTLMDNYDYVMYGKVFKYKDNNMKVEVYISFGGLLMKLAGDPAKLEPIEVDSNVYLLLKKL
300263278	Hypothetical protein VOLCADRAFT_120953, containing cd00268 DEAD-box helicases domain (DBH)*	CHACVGGpTSVR	0.125002	Decreased(2)	Decreased(2)	0.16634	0.083665		T147	HACVGGTSVREDA		0.16634	0.083665																				Nuc	Nucleus	Normal (0.60)	Cytoplasm	0.92	Nucleus	Nucleus	16.78	_	2	MAAPPVEQRTGFDDRAFDSKMQAFLTNNQDNFYTDWEESFESFDQMNLHENLLRGIYAYGFEKPSAIQAKGIVPFTKGLDVIQQAQSGTGKTATFCAGILNNLDYNLNECQALVLAPTRELAQQIEKVMRALGDFLQVKCHACVGGTSVREDARILGAGVQVVVGTPGRVFDMLRRRYLRADNIKMFVLDEADEMLSRGFKDQIYDIFQLLPPKLQVGVFSATLPPEALEITRKFMNKPVRILVKRDELTLEGIKQFYVDVDKEEWKLDTLCDLYETLAITQSVIFANTRRKVDWLTEKMRERDHTVSATHGDMEQNARDVIMREFRSGSSRVLITTDLLARGIDVQQVSLVINYDLPTQPENYLHRIGRSGRFGRKGVAINFIVKEDERMLQDIQRFY…
307110542	Hypothetical protein CHLNCDRAFT_34097, containing pfam06424 PRP1 splicing factor domain (PRP1)*	GYLpTDLK	0.62392	Decreased(2)	Decreased(1)	0.70455	0.54329		T255	DPKGYLTDLKSVT		0.70455	0.54329																				Nuc	Nucleus	Normal (0.35)	Nucleus	0.89	Nucleus	Chloroplast	13.67	Mitochondrion	3	MSRQGVRPQPLPPGLKVDFNALRAPSGYVAGMGRGAAGFTTRSDIGPSMPAPDVKKDKAGTRAGGLVADADAGADDTKFDAFLGNDAGVLGATGVYDEEDREADNVWDNVEDRMDERRKERRETKLKEELEQFRAENPKIQEQFADLKRKLADVPMEQWEAIPDIGDYTVKKQKHLDRFTPVPDSLLAGAAARDATATAIDAHGPGGLETPMGGGITTDLTAMGAGRNTVVQLKLDKISDSVSGQTVVDPKGYLTDLKSVTLKSDAEISDIKKARLLLKSVINTNPRHAPGWIAAARLEEVAGKLQQASGLPWHACSRTAGCCELCPSNEDVWLEAARLQTAENAKAILARGVAALPDSVKLWMQAARLEQSDDAKKRVLLRALERIPQSVRLWKAVVE…
226455398	Set domain protein (SET)	ATAPFPPDEPpSR	0.25595	Decreased(2)	Decreased(2)	0.25853	0.25337		S138	FPPDEPSREYEPS		0.25853	0.25337																				#Nuc[4]	Nucleus	Strong (0.93)	Cytoplasm	0.89	Mitochondrion/Nucleus	Nucleus	17.63	_	2	MASARTPTHEASFDDRGAYVVRVRLPGVSSSSAVSVDVVNGDVLEVFALAYGGDDDDDDASSASSAAGGWRLTHPLPFAVSSSSSSSARAEVSRVKFSKKSRTLTVAFDGASAMDPSPTPTKAAAERATAPFPPDEPSREYEPSPPPSPISRASDDDDDRREEEEDASEPSSSSPGRSPPPPPPPRRPPPRDAAPSQTLPGGIDFAFDPNLYLCVDATGARGRHLRARRALREGDVVMTCDPLVCAVHDRHAERACAFCYRDVDGGGVRCDACDAALYCGRRCRAADTSHVGECALARRAKTDPRLSSATRGLRLFLRLLYVRATAPGLFDAVKALDSPFRDVSAEKRATYVGMANAVNSMLPPGPARMDVDALAEVMSKVHVNSHGVVDAAGRALGTG…
	Protein synthesis (4)
158283213	Ribosomal protein S3a (RPS3a)	VFEVpSLADLQK	2.7358	Increased(1)	Increased(1)	2.7358			S69	GRVFEVSLADLQK	CK2;PLK;PLK1	2.7358																					#Cyt[5]	Cytoplasm	Small (0.11)	Cytoplasm	0.96	Nucleus	Cytoplasm	56.39	_	2	MAVGKNKRISKGKKGGKKKASDPFAKKDWYDIKAPTMFTVRNVGKTLVTRTQGTKIASEALKGRVFEVSLADLQKNEDDAFRKMRLRVEDVQGRNCLTNFWGMDFTTDKLRSLVRKWQTLIEAHVDVKTTDGYTLRVFCISFTKKRQGQIKRTCYAQSAQIRQIRKKMMEIITREATSCDLKELVAKFIPESIGKDIEKSCQGIYPLQNTFIRKVKVLKAPKFDITKLMEVHGDYSEEVGAKIERPAAAAPAVEEAATA
158276036	Ribosomal protein S6 (RPS6)	KGEQELPGLpTDEEKPR	1.5576	Increased(1)	Increased(1)		1.5576		T127	QELPGLTDEEKPR	CK2		1.5576																				Cyt, Nuc	Cytoplasm	Very strong (0.97)	Nucleus	0.96	Chloroplast/Cytoplasm/Nucleus	Nucleus	17.12	_	1	MKLNIAYPATGCQKKLEVDDEAKLRAFYDRRVAAEVDGEVLGEEFKGYVLKIAGGQDKQGFAMKQGVLTNARVRLLMTPGDQGFRGYGRRKGERRRKSVRGCIVSPDLAVLNLVIVKKGEQELPGLTDEEKPRIRGPKRASKIRKMFNLGKVDDVRKYVTIYSRERTDKNGKKHRKCPKIQRLVTPAALQRKRARKSLKKRQQEKNKTDAAEYHKLLMQRLKEQRERRSESLAKKRAMRVASQASKEA
246880774	Ribosomal protein S9 (RPS9)	EFPIENpSoMEESSK	2.0833	Increased(3)	Increased(3)	2.0414	2.0817	2.1268	S140	EFPIENSMEESSK	CK2;GSK3;PLK;PLK1	0.93071	2.0549	2.1268																			Chl	Chloroplast	Normal (0.61)	Chloroplast	0.92	Chloroplast	Chloroplast	38.39	_	3	MGEIGKKSFMNILARSVGRRKEAVAQVQIVKGTNEAPGGQFIINNIPAENYLHNNTCSILSVKAPISILQSLHDASVEGENTDFKNDLGNFNTVVKVKGGGLVGQAEAIKLGLTRAICQLYAITPNNQNKSIREFPIENSMEESSKISSSGMSYETTIELRKQFKDKGFLTQDSRVKERRKYGLKKARKASQYHKR
158274884	Ribosomal protein L12 (RPL12)	VTGGEVGAASpSLAPK	10.3494	Increased(2)	Increased(2)	8.1028		12.596	S27	EVGAASSLAPKIG		8.1028		12.596																			Cyt	Cytoplasm	Very strong (0.98)	Cytoplasm	0.91	Cytoplasm/Nucleus	Chloroplast	26.69	_	1	MPPKFDPSDVVEVCVRVTGGEVGAASSLAPKIGPLGLSPKKIGEDIAKETLKDWKGLRITVKLTVQNRQAKISVIPSAAALVIKALKEPARDRKKEKNIKHTGSVTMSDIIEIARVMRPRSCAKDLANGCKEILGTAVSVGCKVDGKDPRDVISAIDDGAIEIPDA
	Protein folding and transporting (1)
300266633	Hypothetical protein VOLCADRAFT_120515, containing cd00632 prefoldin beta domain (PFDb)*	RSApSSLLSpSEVpSR	0.0060834	Decreased(1)	Decreased(1)		0.0060834		S768	DDRRSASSLLSSE	CAMK2;GSK3		0.0060834		S773	ASSLLSSEVSRLR	CK1;NEK6		0.0060834		S776	LLSSEVSRLRAET	CK1		0.0060834								Nuc	Nucleus	Normal (0.78)	Nucleus	0.84	Nucleus	Nucleus	16.85	_	3	MSTDPETVRKALQKEAEAYRGHQGELSKLATTKRDLTARHQETETVLEELKLLDEDANVFKAVGPVLVKQDLLEARTNVTNRLEFIKKDIERLDNQIKSVESKMLDREKEVIYHLNNKNEDNELDLVELAEQYETEIEQILKDTADKINHFKAQLDAANDAARIAELTKQIEAKYDDERRRCITEIESIRKRAAEKEAAIQKAATKQIEGLQTQVDELQRQLQARIKEVNNMSLNANASNQELQAALARARQETEDAIQTHNKKYNDMLAERMRKEDDLSEQLEGLRRQLDAANRSREQLEAASGEARTRWDQERAAMTEERKASDASWKGKVEALVEEVQREKAAGKEAAKRAADAAAAADAAATQRIKQLEGSLGGVEAQLQGKAEEAARQVQWHWL…
		RSASSLLSpSEVpSR	0.0063346	Decreased(1)	Decreased(1)		0.0063346		S773	ASSLLSSEVSRLR	CK1;NEK6		0.0060834		S776	LLSSEVSRLRAET	CK1		0.0060834
	Protein degradation (3)
307111867	Hypothetical protein CHLNCDRAFT_133427, containing cd00118 Lysin motif domain (LysM)*	QHApTEAFAEAWGQQEQQQQQQQQHPELHIpSADALK	8.81695	Increased(2)	Increased(2)	5.6149		12.019	T2264	DDRQHATEAFAEA		5.6149		12.019	S2290	HPELHISADALKI	NEK6	5.6149		12.019													Nuc	Chloroplast	Small (0.17)	Nucleus	0.86	Nucleus	Nucleus	19.12	_	3	MGLFGGKKHTVVAGDTLQSIAAQYGTTPEALLKRNRKQVQSAEQIQPGMAFRRLCTRCPAAAEPPCVQQLGGEQGSVASPQQYLQALQELLVQYDVTLPAATLFRPVLLKAVAGLVEAAIGSRRGGTGRGGAVQPGPELAVALLSVLELAPHTEGLVLRYFHHAPPPFHYLLPPAADGAASCAVPVGQLARSTLRGLQLLPQLQWPVAAALPALLQHADADVRWCAAECAALAFGLQDASRAKLAGRVLSEEEEAQCRLRWQNERAMYCAELAVMYCSSTSSSHGLAAGSSGQQAEAMDAAPTPPAARRGAGAARSGDSSGSRKRKHGGGGEDSDADTAALGGAAGGMAPAAGYVEVCGLELPQRQQHGGGGGAALAPLVHTPAVDHNLEALALGLCLG…
300256553	Hypothetical protein VOLCADRAFT_109434, containing cd00195 Ubiquitin-conjugating enzyme E2 catalytic domain (UBC)*	LFpSVKDK	3.6229	Increased(1)	Increased(1)		3.6229		S6	_MLKLFSVKDKQK	CHK1;CK2		3.6229																				Nuc, Cyt	Nucleus	Strong (0.91)	Cytoplasm	0.83	Nucleus	Nucleus	21.63	_	3	MLKLFSVKDKQKQQQEANAGAGKPGKLSAGELRIQKDMAELNLPPNITISFPDGKDKLMHFFIAIRPDEGIYRGGKFNFEFNIPTGYPHDAPKVLCTTKVYHPNIDLEGKICLNILREDWKPVLSISSVIYGLQFLFLDPNPDDPLNKEAAQMFVDNPRQFEQYVQRAIHYGTYINNVHFPSCTA
158279575	Membrane AAA-metalloprotease (FtsH)	GCLLVGPPGpTGK	1.7662	Increased(1)	Increased(1)		1.7662		T304	LVGPPGTGKTLLA			1.7662																				Chl	Chloroplast	Normal (0.72)	Chloroplast membrane	0.94	Chloroplast	Chloroplast	56.17	Mitochondrion	5	MSAFTARPEALASKAGRRTFARNTEALRSQLLGLPKRSSRVTAKYSPKQLSENLASELVAKLPKAALASL LSLSTAGVATAADYFAPPTDANTTTTTATTQAPASMNFASSAPLAAPEVRSEYTLPEGNQWRYSEFVNAV EAGKVERVRFSKDGSQLQLTAVDGRRATVVLPNDPDLVDILAKNGVDISVSEGDQQGNYVALLGNILFPL IAFGGLFFLFRRSQNGGGGAGPMGGMGGAMDFGRSKSKFQEVPETGVVFDDVAGCDGAKLELQEVVDFLK NPDKYTALGAKIPKGCLLVGPPGTGKTLLAKAVAGEAGTPFFSCAASEFVEVFVGVGASRVRDLFEKAKS KAPCIIFIDEIDAVGRQRGAGMGGGNDEREQTINQLLTEMDGFE…
	Signaling (4)
300256509	Hypothetical protein VOLCADRAFT_84366, containing cd07419 Arabidopsis thaliana Bsu1 phosphatase and related proteins, C-terminal metallophosphatase domain (BSU)*	QLpSIDQLDNEGR	0.14124	Decreased(1)	Decreased(1)		0.14124		S497	GLVRQLSIDQLDN	CAMK2;CHK1;CHK1/2;PKD		0.14124																				Cyt, Nuc	Cytoplasm	Normal (0.48)	Nucleus	0.9	Cytoplasm/Nucleus	Nucleus	45.83	_	4	MDSDLRPSPVPRPRVFPVVGTAPGPRCGHTLTAISGPEGDLSKAKLVLFGGATALEGSSGKSEGAQSTPGSAASGRALFAGIRLAGATNDVHIFDVRTGKWEKTTPAGEPPSPRAAHAAAAVGNMVVIQGGIGPAGLASEDLHVLDFTDPDRPRWHRVLVSGPGPSARYAHTLSLVANRFLVAMGGNDGKSTLGDAWALDTSEKPYAWRKITDAGEMPSPRMYATAAARSDGLLLLCGGRDVGGTPLGDAYGFARHRDGRWEWHSAPGAMPTGRYQHGAVFVGNRLHISGGAVGGGRMVDEGTSTVVLDTTHGCWVTPTSVASGEDFTRRCRHAVASVGPFVFIYGGLKARWYGSQLLDDLLVADDSNGTELSIFDPRSSAWQQYMESMHGNAAASRML…
158271168	Snf1-like protein kinase (SnRK)	FQpSAPGpSR	0.038049	Decreased(1)	Decreased(1)			0.038049	S173	KHEKFQSAPGSRV	GSK3			0.038049	S177	FQSAPGSRVGTPA	CK1			0.038049													#Cyt[6], Nuc	Cytoplasm	Strong (0.90)	Nucleus	0.89	Nucleus	Nucleus	23.34	_	4	MAAANQKPGPAGRPEPLIGHPRYEKIKDLNSGTFGFVQLARDKLTGETWAVKFIERGDKITKYVEREIINHRCLVHPHIVQFREVFLTPTHLCIVMEFAPGGDMFEYVVRKNGLREDEARWFFQQLIVGLDYCHRMGVVNRDIKLENTLLDSSPRPLVKICDFGYSKHEKFQSAPGSRVGTPAYLAPEVILTTKGKTYDGKIADIWSCGVMLYVMLVGAYPFERPEDKHDNQKLQKMIQRILHVDYHIPPHVRASEDCKDLLAKILVADPHKRITVDGIYNHKWYLKGLPPGVREMNDRVQPPPEGLQSVEEIKRLIEEARHVGVGAPGYVNPVETDEYIDDAMDNMYDEGSLDYND
307105164	Hypothetical protein CHLNCDRAFT_136605, containing cd14137 glycogen synthase kinase 3 (GSK3)*	GEPNISpYICSR	0.484815	Decreased(2)	Decreased(2)	0.58121	0.38842		Y251	GEPNISYICSRYY		0.49909	0.38842																				#Cyt[7]	Mitochondrion	Normal (0.34)	Cytoplasm	0.83	Nucleus	Nucleus	18.66	Chloroplast	4	MDALKKITGKRSSSDAATEAATGSRREVSSASNQRATAEVQQQFKELTLSPAQREGKEPVFEGRVTEGDPNNVGHVITTAGGSGASKQVIRYLTERVVGNGSFGVVFQAKCIETSETVAIKKVLQDKRFKNRELQIIRMMSHPNIVQLKHCFYTTTEKDEVYLNLVLEYVPDTVYRINKHYTKNEQRMPIILVKLYTYQMLRALAHIHSIGVCHRDIKPQNLLVNINTHALKLCDFGSAKTLVRGEPNISYICSRYYRAPELIFGATDYTCAIDVWSVGCVMAELLLGSPLFPGESGVDQLVEIIKVLGTPTREEIHAMNPNYTEFKFPQIKAHPWAKVFSKRMPADAVELVSKLLVYSPAQRSTALDALRHAFFDELRDPACRLPNGRPLPPLFNWID…
300266429	Hypothetical protein VOLCADRAFT_116796, containing cd00173 Src homology 2 domain (SH2)*	DSFDVTVEMLMQQQQPLQYPLQR	0.33956	Decreased(1)		0.33956																											#Cyt[8]	Chloroplast	Small (0.22)	Secreted	0.84	Nucleus	Nucleus	21.02	_	4	MGTGLGPAWFSQEFPGLAARREPFPDVDRWQTTYVRYSSSETAQARGWNAECCRRNLHSLGVNDHPILRQHNLPDAINMRIIEAPAEFALPVKQDRRLLPCFKVRLEVQHHGALWLPVTLRAHVLSQQDKEQITSWLPPDDINGRDDKVQAAANGETRAVGIGGKDGQSLPQSANGGSTALVYSSSLRSTDRLSVKLEPSSFSFSGDAAGGGAGGGGAGGVSSSFNPDGLGGNSSAGVRTLSGLQPDQHNVLEPYGLMESAGLTVNGMIRDMGPAGRQHGLTSGGSAAAAGRDPIGPLNSLFAANRPDPVVTLASSGRMSSTGNGLAMAGNGARLGTGEPRDSFDVTVEMLMQQQQPLQYPLQRRSSPIHGGGALEAPAAPAGGIGGQLIHEMQRQLQQ…
	Function unknown (3)
226455999	Predicted protein, no putative conserved domains have been detected*	FpSIMpTALYFAPpSALVPLVAGGVpSSLPK	1.5688	Increased(1)	Increased(1)			1.5688	S52	VTPTRFSIMTALY	AURORA;AURORA-1;PKA			1.5688	T55	TRFSIMTALYFAP	CK1			1.5688	S62	ALYFAPSALVPLV				1.5688	S73	LVAGGVSSLPKHH				1.5688	Sec	Chloroplast	Small (0.09)	Secreted	0.8	Cell membrane/Golgi apparatus	Nucleus	19.58	Secretory pathway	4	MALPPRLRRGVVCAALLAIVLACNHFCRDAPGTIEEQLRADPSLDVTPTRFSIMTALYFAPSALVPLVAGGVSSLPKHHAAYVSPQRAFATVAAVGAAGNVLSAAGASSGSFAALACGRAVAGSVYEAIDMTPLGFVPALLPGLWGTASGFITGALRLGSVLAFAALPRIYEQSGGGADGGGGVAAVFWFAACVGVVMWPLAAIVREVATRAAFDASPHWGGGSLGARLRAWLSDGGDGGDDDDDGGGGAASGGGGGEALKAFESSTGGGGGEAPTPPIASSIATAVAAVVSAVETVPRSFWLYALSGTCMYRRRRRGRDVAAADELMLLPELALAVLSVPIGVAVDRAKLSFRAQQLGFSVCALMITLAHAALLFGGDEVAAVFFLGVGYACCNQVRS…
226457710	Predicted protein, no putative conserved domains have been detected*	GTpTpSSQK	0.34099	Decreased(1)	Decreased(1)& No change(1)			0.34099	T109	PGRRGTTSSQKSL	CAMK2			0.85908	S110	GRRGTTSSQKSLA	GSK3			0.44476													－	Nucleus	Small (0.05)	Cytoplasm	0.85	Cell membrane	Chloroplast	49.39	_	2	MEEAEAAAAAGGGAAMRSVPLPERFDSTNGGWGLGGTGIRPAAKAPSKSRRAMSMTSSSLNNPYAPSDGGAVRGGGEFSNQSNYFAGTLRSGDVRSSSGAMIPGRRGTTSSQKSLASSTVGAKAPAAASNSNSKGIFRAVEEVKVTKGVGSADPAFLKRVNSMSLTSSPRSGASVRAINPATRERK
		GTpTSSQK	0.61301	Decreased(1)	No change(1)			0.61301	T109	PGRRGTTSSQKSL	CAMK2			0.85908
300267726	Hypothetical protein VOLCADRAFT_86882, no putative conserved domains have been detected*	GTpSTPDVR	0.34207	Decreased(1)	Decreased(1)			0.34207	S539	EDMRGTSTPDVRS	CAMK2;CK2			0.34207																			Nuc	Mitochondrion	Small (0.03)	Nucleus	0.86	Nucleus	Plasma Membrane	15.34	Secretory pathway	2	MFARQCKPPVARLLLFLLACLKLQAIIAAHISWDWGASNRRLQPSPTAFVYDSQSCLCTKFSKVGNFTNDFLKLCSYLDQCGGSQYRILNSYLVSEDCDPESQIDCETLPAGYRSCDAWISDLSGSNASTACPEFSCCELAPSQPNVTTCRDNSLYCFNKGPQLPNDPSYIRYCNTSQRPRNETQVCSWKWSTKDGSPSPSPSSPSLPPSSPPPPSSASPPSFPPPKPNPLAPSALNPELPSPPQTSILVVPDETAAISASPPSPKPPRPRSPLPPSPKPPPYSPPTPPSPGPKPPKPPPPPSIRPKPTNPSGLTDKQITVVILASVGGSVAVGLVITAVIAYRNCCKKANLRPLLHPGPSSKYRYTEEDEYPEDYQQEEAEEEYSHAASKRRTGRTQT…
a Database accession numbers from NCBInr. b The name of the proteins identified by LC-MS/MS and the functional categories of proteins according to the GO criteria, KEGG and NCBInr database. Protein names marked with an asterisk (*) have been edited by us depending on functional domain searching and similarity comparison according to the Gene Ontology criteria. The abbreviations for the protein na…
